# Supplementary material
Source: publisher figshare collection journal article supplement (https://acs.figshare.com/ndownloader/files/29093343)
Supplement: Supplementary file 1 [file 29093343]

## Supporting Information

# MOF-Embedded Bifunctional Composite Nanofiber Membranes with Tunable Hierarchical Structure for High-Efficiency PM<sub>0.3</sub> Purification and Oil/Water Separation

*Yajian Li, Ding Yuan<sup>\*</sup>, Qian Geng, Xue Yang, Huizhi Wu, Yuze Xie, Liming Wang, Xin Ning, Jinfang Ming<sup>\*</sup>*

Industrial Research Institute of Nonwovens & Technical Textiles, Shandong Center for Engineered Nonwovens (SCEN), College of Textiles & Clothing, Qingdao University, Qingdao 266071, Shandong, P. R. China

\* E-mail: [yuanding@qdu.edu.cn](mailto:yuanding@qdu.edu.cn) (Ding Yuan); [mingjinfang@qdu.edu.cn](mailto:mingjinfang@qdu.edu.cn) (Jinfang Ming)

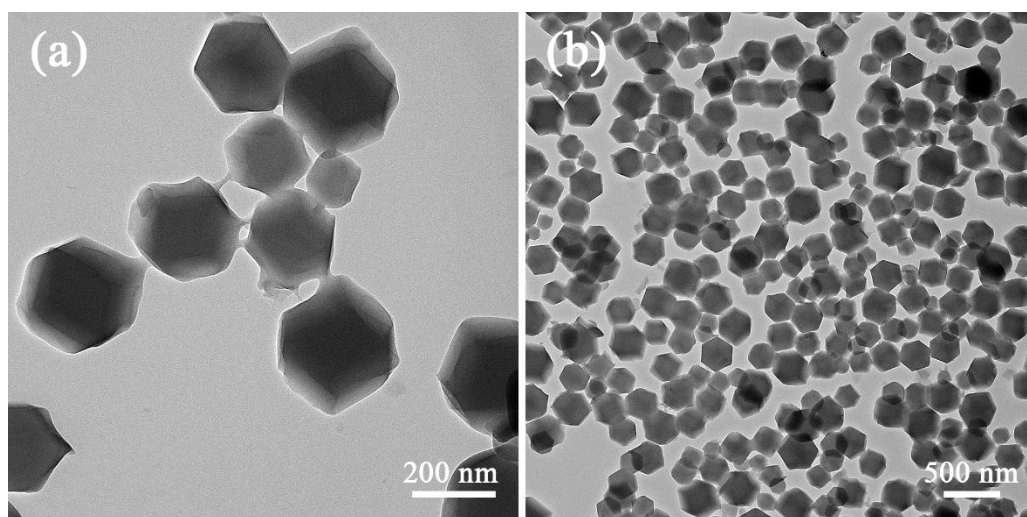

**Figure S1.** (a, b) TEM images of ZIF8 NPs.

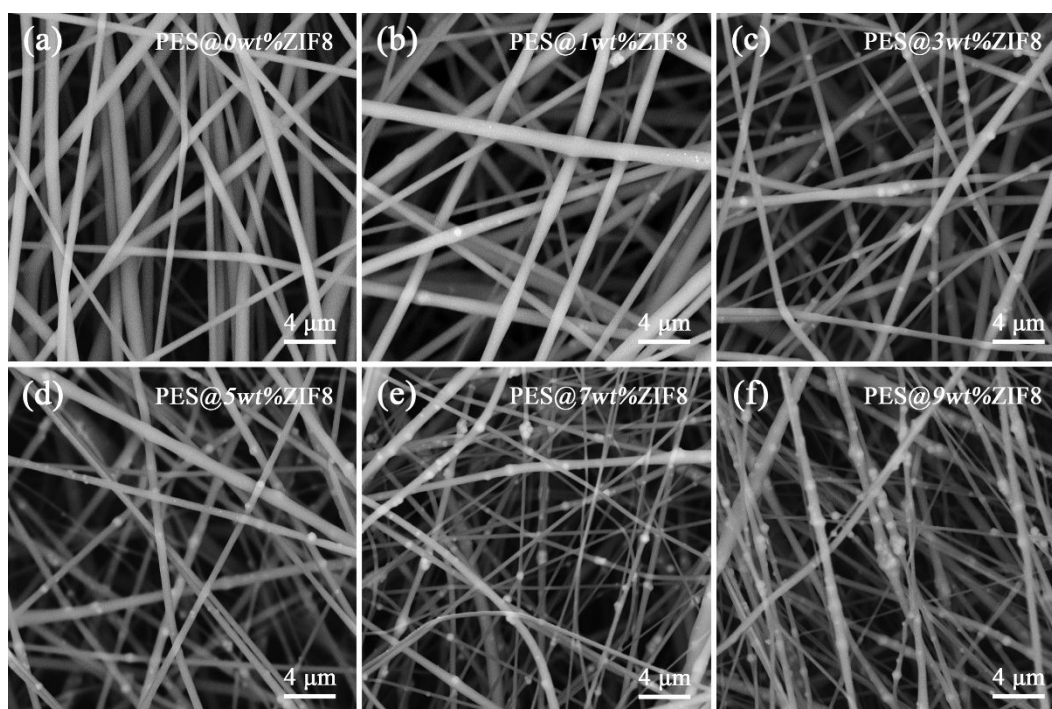

**Figure S2.** SEM images of the PES@ $x$ wt%ZIF8 membrane with ZIF8 NPs concentration of 0 wt% (a), 1 wt% (b), 3 wt% (c), 5 wt% (d), 7 wt% (e), and 9 wt% (f), respectively.

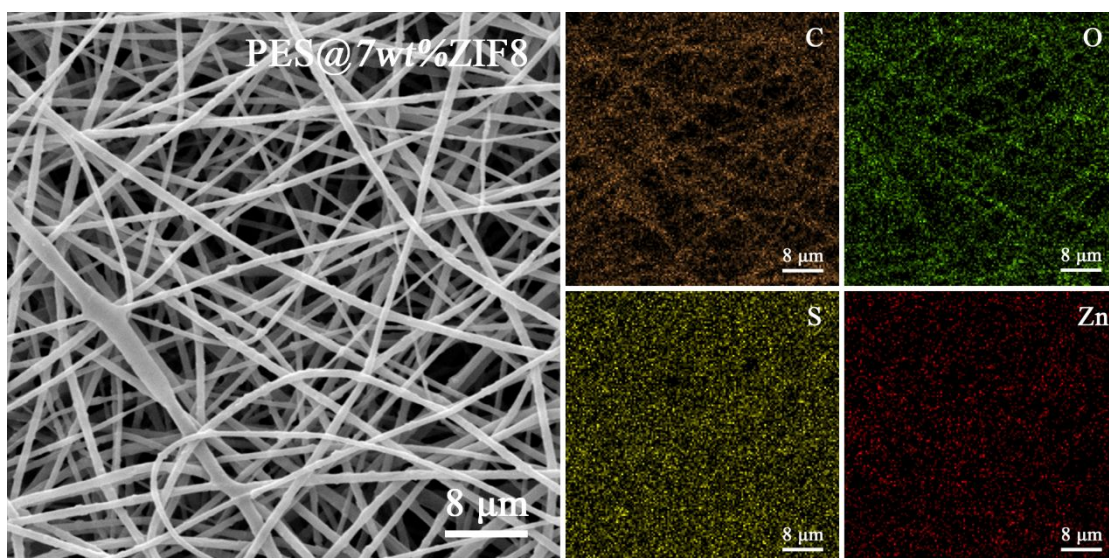

**Figure S3.** SEM and the corresponding element scanning images of PES@7wt%ZIF8 membrane, showing the distribution of C, O, S and Zn.

**Table S1.** Pressure drop and porosity of PES@*xwt%*ZIF8 membrane.

| Sample                | ZIF8<br>concentration<br>(wt%) | Pressure<br>drop<br>(Pa) | Porosity<br>(%) |
|-----------------------|--------------------------------|--------------------------|-----------------|
| PES@ <i>xwt%</i> ZIF8 | 0                              | 1                        | $87.6 \pm 0.7$  |
|                       | 1                              | 2                        | $86.1 \pm 1.3$  |
|                       | 3                              | 2                        | $85.9 \pm 1.6$  |
|                       | 5                              | 2                        | $83.2 \pm 2.1$  |
|                       | 7                              | 3                        | $80.2 \pm 1.4$  |
|                       | 9                              | 3                        | $78.5 \pm 1.7$  |

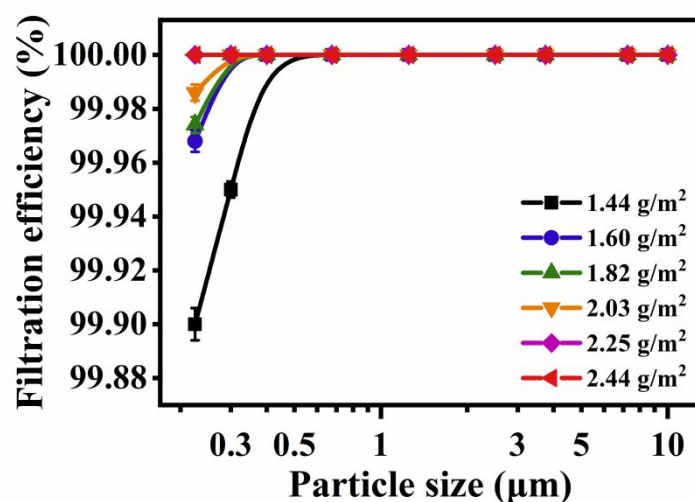

**Figure S4.** Filtration efficiency curves of PES@7wt%ZIF8-PSA/PES filter with different basis weight for NaCl airborne particles with various sizes.

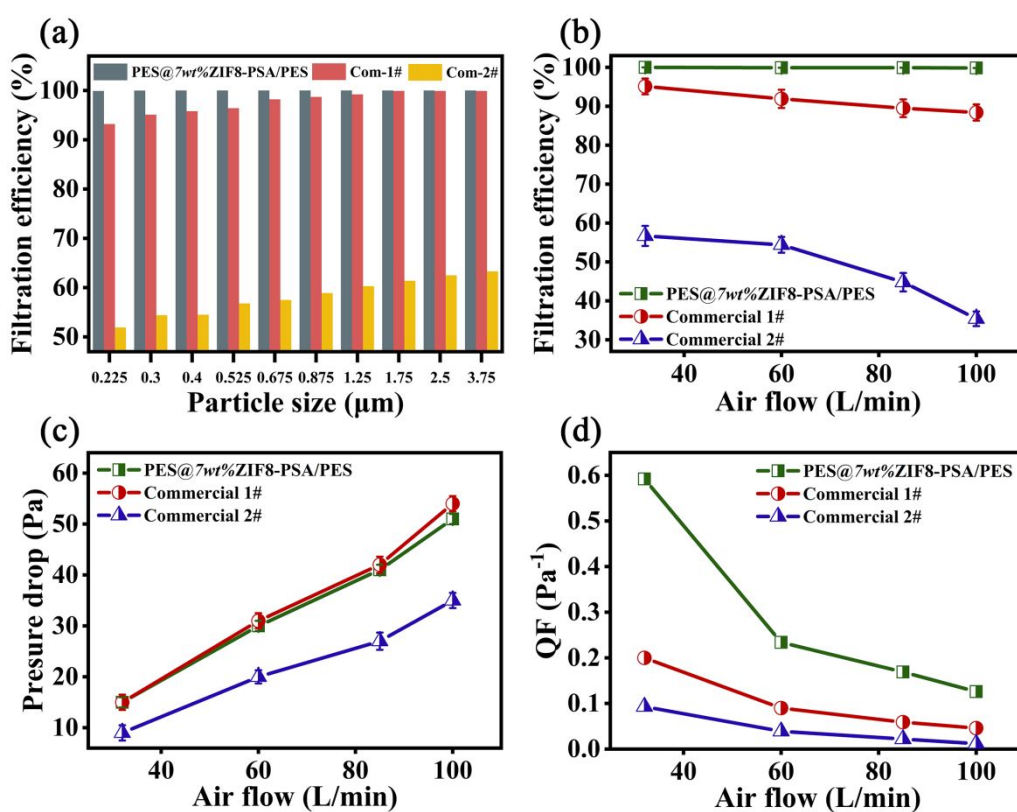

**Figure S5.** (a) Filtration efficiency of the PES@7wt%ZIF8-PSA/PES membranes and commercial filter materials for NaCl airborne particles with various sizes. (b)-(d) Filtration

performance of the PES@7wt%ZIF8-PSA/PES membrane and commercial filter materials for NaCl particles under different airflows.

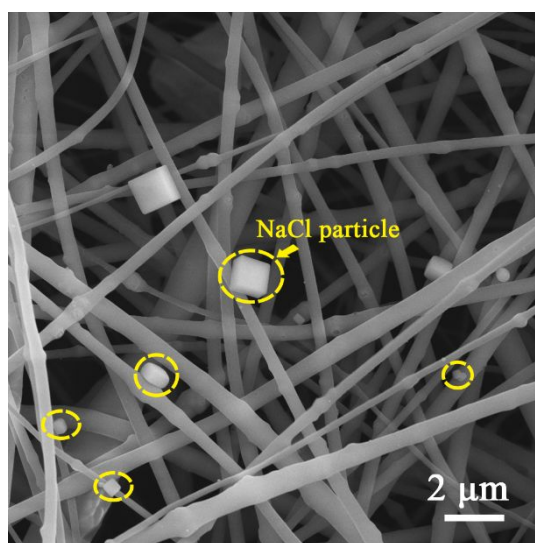

**Figure S6.** SEM image of PES@7wt%ZIF8-PSA/PES membrane after filtration.

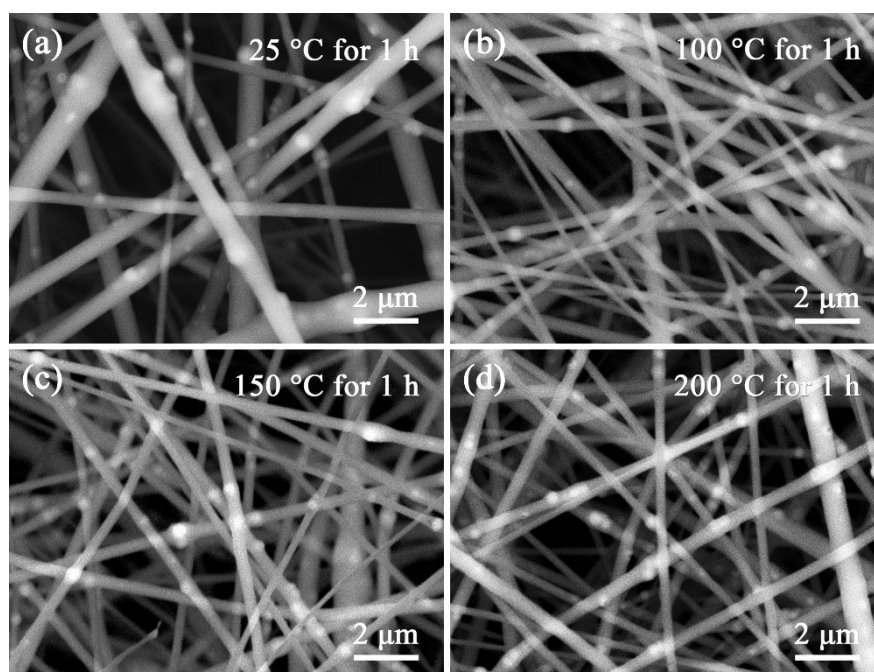

**Figure S7.** SEM images of PES@7wt%ZIF8-PSA/PES membrane treated at different temperatures over 1 h.
